# Supplementary material
Source: Springer Nature journal article supplement (https://www.springermedizin.de/resource/supplementary/12936_2012_2595_MOESM6_ESM.pdf/9543154)

Gabonese children (day 0)

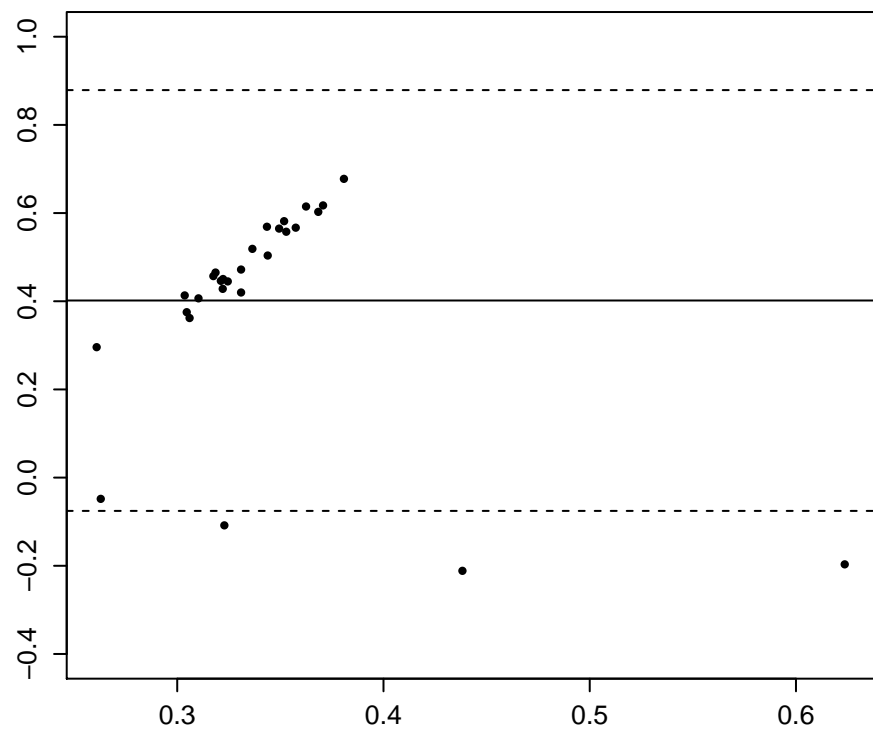

Gabonese adults (day 0)

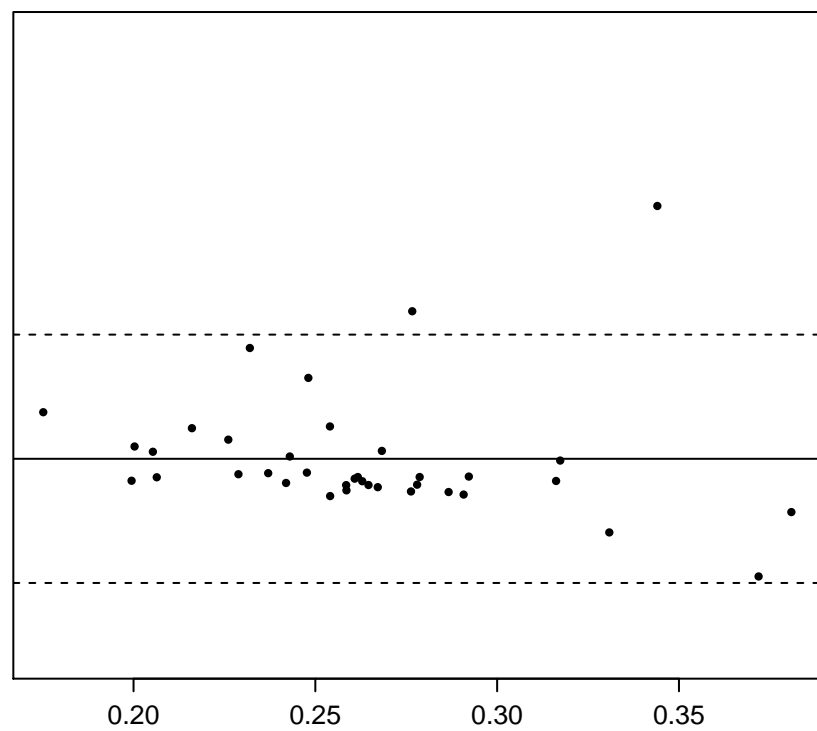

k-means

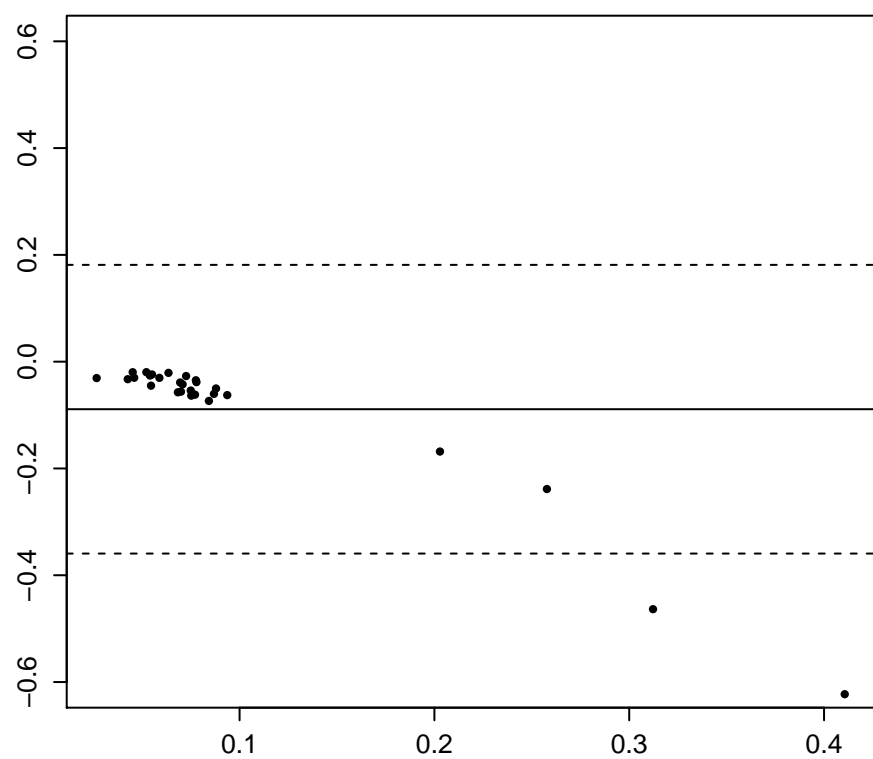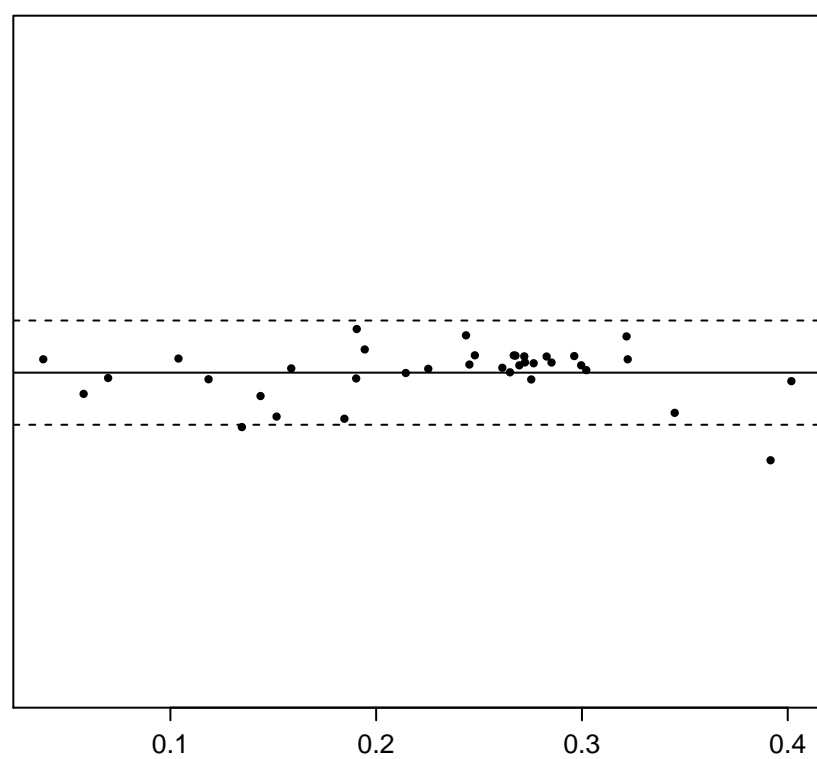EM based  
clustering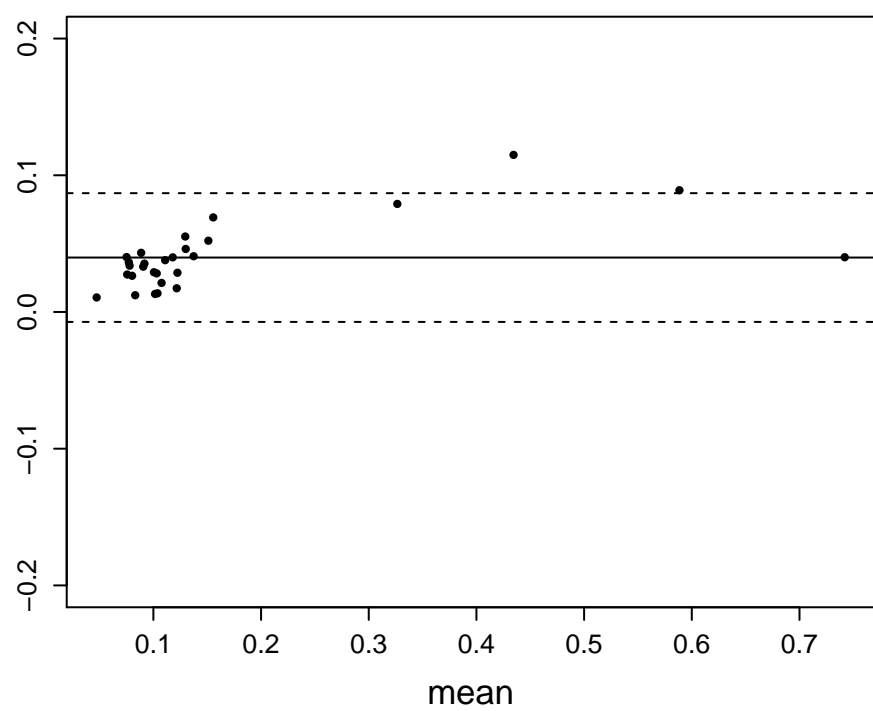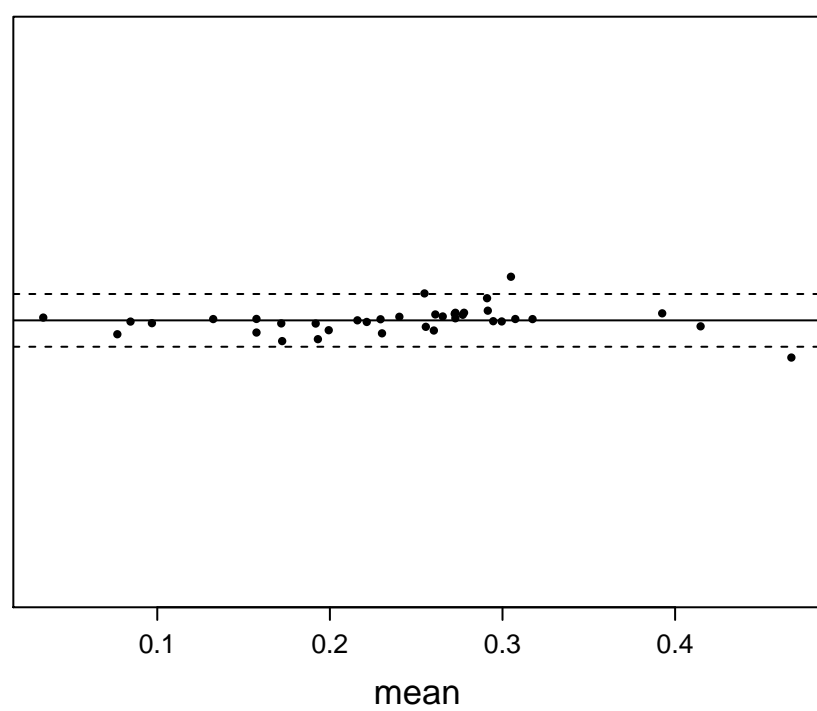Overlap  
subtraction

Supplement: MOESM6 [file 9543154]
